# Supplementary material for: Assessing Grain Yield and Achieving Enhanced Quality in Organic Farming: Efficiency of Winter Wheat Mixtures System
Source: MDPI journal article supplement (doi:10.3390/agriculture13050937), 2023-04-24
Supplement: s1 [file s1]

**Table S1.** Growth, yield, and quality of winter wheat under the effect of the harvest year, sowing method, and combination.

| Season  | Variable             | Plant height<br>(cm) | Spike<br>number<br>(No. m <sup>-2</sup> ) | TKW<br>(g) | Yield<br>(t ha <sup>-1</sup> ) | HW<br>(kg hL <sup>-1</sup> ) | Protein<br>content<br>(%) | Wet gluten<br>(%) | Gluten<br>index<br>(%) | Falling<br>number<br>(s) |
|---------|----------------------|----------------------|-------------------------------------------|------------|--------------------------------|------------------------------|---------------------------|-------------------|------------------------|--------------------------|
| 2019/20 | <b>Sowing method</b> |                      |                                           |            |                                |                              |                           |                   |                        |                          |
|         | Control              | 94.17                | 422.33                                    | 51.46      | 6.78                           | 72.02                        | 8.99                      | 14.10             | 80.27                  | 261.50                   |
|         | Mixed                | 90.42                | 356.67                                    | 49.92      | 4.94                           | 71.90                        | 9.19                      | 17.08             | 59.91                  | 239.00                   |
|         | Row-Row              | 91.58                | 463.33                                    | 49.77      | 5.54                           | 72.87                        | 9.48                      | 16.60             | 70.71                  | 243.25                   |
|         | <b>Combination</b>   |                      |                                           |            |                                |                              |                           |                   |                        |                          |
|         | Butterfly            | 95.00                | 380.00                                    | 48.97      | 5.74                           | 73.53                        | 9.60                      | 16.66             | 84.98                  | 310.00                   |
|         | Illusion             | 90.00                | 450.67                                    | 51.42      | 7.19                           | 73.33                        | 9.08                      | 18.01             | 58.82                  | 226.00                   |
|         | Lorien               | 98.33                | 372.00                                    | 55.73      | 6.76                           | 70.60                        | 9.23                      | 17.31             | 79.84                  | 248.33                   |
|         | Vanessa              | 93.33                | 486.67                                    | 49.73      | 7.42                           | 70.60                        | 8.04                      | 4.44              | 97.44                  | 261.67                   |
|         | Bu+Lo-Mi             | 91.67                | 276.00                                    | 50.80      | 4.54                           | 73.70                        | 9.60                      | 19.34             | 56.79                  | 250.67                   |
|         | Bu+Va-Mi             | 90.00                | 424.00                                    | 48.78      | 5.30                           | 71.33                        | 9.13                      | 14.76             | 64.04                  | 272.67                   |
|         | Bu+Lo-Ro             | 93.33                | 340.00                                    | 50.82      | 4.40                           | 72.07                        | 9.44                      | 18.84             | 63.53                  | 223.67                   |
|         | Bu+Va-Ro             | 86.67                | 386.67                                    | 49.27      | 5.52                           | 70.50                        | 8.59                      | 15.38             | 55.27                  | 209.00                   |
|         | Illu+Lo-Mi           | 99.33                | 417.33                                    | 50.75      | 5.12                           | 73.57                        | 10.46                     | 16.31             | 76.58                  | 249.67                   |
|         | Illu+Va-Mi           | 88.67                | 485.33                                    | 49.22      | 5.63                           | 71.83                        | 9.50                      | 17.51             | 75.83                  | 299.33                   |
|         | Illu+Lo-Ro           | 90.00                | 421.33                                    | 48.97      | 5.06                           | 72.53                        | 9.01                      | 16.71             | 73.19                  | 191.67                   |
|         | Illu+Va-Ro           | 88.33                | 529.33                                    | 50.13      | 6.34                           | 73.53                        | 8.94                      | 15.85             | 57.22                  | 232.33                   |
| 2020/21 | <b>Sowing method</b> |                      |                                           |            |                                |                              |                           |                   |                        |                          |
|         | Control              | 66.02                | 261.98                                    | 42.15      | 2.47                           | 68.24                        | 9.31                      | 16.53             | 86.00                  | 240.75                   |
|         | Mixed                | 66.97                | 252.60                                    | 40.81      | 2.28                           | 67.68                        | 9.62                      | 15.05             | 89.99                  | 243.92                   |
|         | Row-Row              | 69.73                | 356.25                                    | 41.05      | 2.80                           | 67.78                        | 9.53                      | 16.08             | 90.19                  | 236.25                   |
|         | <b>Combination</b>   |                      |                                           |            |                                |                              |                           |                   |                        |                          |
|         | Butterfly            | 66.73                | 228.47                                    | 43.71      | 2.18                           | 64.73                        | 9.60                      | 18.42             | 92.10                  | 237.67                   |
|         | Illusion             | 64.93                | 251.39                                    | 42.81      | 2.62                           | 72.07                        | 9.57                      | 13.42             | 84.72                  | 237.67                   |
|         | Lorien               | 71.00                | 254.86                                    | 44.92      | 2.51                           | 68.77                        | 9.58                      | 15.88             | 82.97                  | 241.33                   |
|         | Vanessa              | 61.40                | 313.19                                    | 37.17      | 2.55                           | 67.40                        | 8.50                      | 18.38             | 84.19                  | 246.33                   |
|         | Bu+Lo-Mi             | 72.67                | 191.67                                    | 43.90      | 2.18                           | 67.07                        | 9.60                      | 17.06             | 86.37                  | 246.33                   |
|         | Bu+Va-Mi             | 64.07                | 285.42                                    | 39.41      | 2.54                           | 66.70                        | 9.58                      | 13.71             | 90.29                  | 263.00                   |
|         | Bu+Lo-Ro             | 70.70                | 256.25                                    | 41.04      | 2.19                           | 68.90                        | 9.70                      | 12.56             | 92.13                  | 234.00                   |
|         | Bu+Va-Ro             | 60.43                | 277.08                                    | 38.89      | 2.23                           | 68.07                        | 9.61                      | 16.88             | 91.17                  | 232.33                   |
|         | Illu+Lo-Mi           | 74.77                | 292.36                                    | 43.99      | 2.18                           | 66.23                        | 9.09                      | 15.53             | 89.22                  | 239.67                   |
|         | Illu+Va-Mi           | 65.70                | 397.92                                    | 38.31      | 2.50                           | 66.00                        | 9.72                      | 13.10             | 94.41                  | 253.33                   |
|         | Illu+Lo-Ro           | 74.97                | 352.08                                    | 42.81      | 3.19                           | 69.17                        | 9.77                      | 18.64             | 82.16                  | 222.33                   |
|         | Illu+Va-Ro           | 63.47                | 382.64                                    | 39.08      | 3.34                           | 69.73                        | 9.55                      | 17.03             | 94.97                  | 229.67                   |
| 2021/22 | <b>Sowing method</b> |                      |                                           |            |                                |                              |                           |                   |                        |                          |
|         | Control              | 82.34                | 308.18                                    | 43.23      | 5.28                           | 73.63                        | 9.15                      | 18.04             | 73.04                  | 224.17                   |
|         | Mixed                | 89.08                | 423.15                                    | 44.56      | 6.86                           | 73.32                        | 9.04                      | 17.28             | 69.43                  | 212.08                   |
|         | Row-Row              | 82.73                | 331.48                                    | 42.10      | 4.95                           | 71.90                        | 8.89                      | 16.13             | 79.70                  | 246.33                   |
|         | <b>Combination</b>   |                      |                                           |            |                                |                              |                           |                   |                        |                          |
|         | Butterfly            | 85.90                | 304.93                                    | 45.00      | 5.19                           | 77.10                        | 9.62                      | 19.27             | 66.37                  | 227.33                   |
|         | Illusion             | 84.67                | 259.83                                    | 43.70      | 5.02                           | 76.37                        | 9.77                      | 22.15             | 73.28                  | 182.67                   |
|         | Lorien               | 90.37                | 308.67                                    | 45.17      | 5.07                           | 70.60                        | 8.84                      | 16.77             | 64.29                  | 229.33                   |
|         | Vanessa              | 68.43                | 359.27                                    | 39.07      | 5.82                           | 70.47                        | 8.38                      | 13.96             | 88.20                  | 257.33                   |
|         | Bu+Lo-Mi             | 93.67                | 378.40                                    | 46.65      | 6.63                           | 73.10                        | 9.25                      | 17.69             | 60.89                  | 221.33                   |
|         | Bu+Va-Mi             | 88.67                | 452.47                                    | 42.60      | 7.03                           | 73.67                        | 9.01                      | 16.44             | 73.30                  | 229.00                   |
|         | Bu+Lo-Ro             | 91.33                | 412.97                                    | 46.60      | 6.73                           | 72.53                        | 9.07                      | 17.90             | 69.84                  | 205.00                   |
|         | Bu+Va-Ro             | 82.63                | 448.77                                    | 42.40      | 7.06                           | 73.97                        | 8.81                      | 17.10             | 73.68                  | 193.00                   |
|         | Illu+Lo-Mi           | 83.23                | 327.77                                    | 43.36      | 4.25                           | 72.40                        | 8.99                      | 15.96             | 81.00                  | 248.00                   |
|         | Illu+Va-Mi           | 82.67                | 359.90                                    | 41.96      | 5.91                           | 72.87                        | 8.62                      | 14.56             | 85.01                  | 250.33                   |
|         | Illu+Lo-Ro           | 88.80                | 296.90                                    | 43.48      | 4.65                           | 71.47                        | 8.88                      | 17.35             | 71.06                  | 243.67                   |
|         | Illu+Va-Ro           | 76.23                | 341.33                                    | 39.60      | 4.98                           | 70.87                        | 9.06                      | 16.66             | 81.72                  | 243.33                   |

TKW, thousand kernel weight; HW, hectoliter weight.

**Table S2.** Rheological properties of dough by Mixolab of winter wheat under the effect of the harvest year, sowing method, and combination.

| Season  | Variable      | WA (%) | TimeC1 (min) | TC2 (Nm) | TC3 (Nm) | TC4 (Nm) | TC5 (Nm) | $\alpha$ | $\beta$ | $\gamma$ | Amp.  | Stability (min) |
|---------|---------------|--------|--------------|----------|----------|----------|----------|----------|---------|----------|-------|-----------------|
| 2019/20 | Sowing method |        |              |          |          |          |          |          |         |          |       |                 |
|         | Control       | 61.05  | 1.92         | 0.38     | 1.70     | 1.01     | 1.71     | -0.08    | 0.50    | -0.11    | 0.08  | 5.11            |
|         | Mixed         | 61.52  | 2.11         | 0.36     | 1.66     | 0.85     | 1.46     | -0.09    | 0.51    | -0.12    | 0.08  | 5.17            |
|         | Row-Row       | 61.70  | 2.63         | 0.37     | 1.65     | 0.87     | 1.53     | -0.08    | 0.52    | -0.09    | 0.07  | 5.88            |
|         | Combination   |        |              |          |          |          |          |          |         |          |       |                 |
|         | Butterfly     | 64.13  | 2.13         | 0.42     | 1.55     | 1.03     | 1.57     | -0.07    | 0.44    | -0.13    | 0.07  | 6.20            |
|         | Illusion      | 61.07  | 1.41         | 0.38     | 1.65     | 0.85     | 1.53     | -0.08    | 0.43    | -0.13    | 0.10  | 4.43            |
|         | Lorien        | 59.90  | 1.99         | 0.36     | 1.71     | 0.96     | 1.69     | -0.09    | 0.52    | -0.11    | 0.08  | 4.50            |
|         | Vanessa       | 59.10  | 2.17         | 0.35     | 1.87     | 1.21     | 2.04     | -0.07    | 0.62    | -0.07    | 0.07  | 5.30            |
|         | Bu+Lo-Mi      | 62.37  | 1.85         | 0.39     | 1.67     | 0.87     | 1.44     | -0.09    | 0.51    | -0.11    | 0.09  | 6.37            |
|         | Bu+Va-Mi      | 62.90  | 3.32         | 0.36     | 1.70     | 0.96     | 1.63     | -0.08    | 0.61    | -0.11    | 0.05  | 4.60            |
|         | Bu+Lo-Ro      | 60.20  | 1.70         | 0.36     | 1.62     | 0.80     | 1.43     | -0.09    | 0.46    | -0.12    | 0.09  | 4.37            |
|         | Bu+Va-Ro      | 60.60  | 1.59         | 0.33     | 1.64     | 0.77     | 1.34     | -0.09    | 0.47    | -0.12    | 0.08  | 5.33            |
|         | Illu+Lo-Mi    | 63.33  | 3.13         | 0.35     | 1.58     | 0.81     | 1.43     | -0.07    | 0.56    | -0.09    | 0.06  | 5.60            |
|         | Illu+Va-Mi    | 63.50  | 3.78         | 0.43     | 1.70     | 1.01     | 1.72     | -0.07    | 0.54    | -0.09    | 0.06  | 7.13            |
|         | Illu+Lo-Ro    | 60.03  | 1.45         | 0.36     | 1.63     | 0.76     | 1.37     | -0.09    | 0.48    | -0.10    | 0.09  | 4.37            |
|         | Illu+Va-Ro    | 59.93  | 2.18         | 0.35     | 1.70     | 0.91     | 1.59     | -0.08    | 0.50    | -0.09    | 0.07  | 6.40            |
| 2020/21 | Sowing method |        |              |          |          |          |          |          |         |          |       |                 |
|         | Control       | 61.88  | 2.07         | 0.38     | 1.61     | 0.92     | 1.68     | -0.08    | 0.53    | -0.08    | 0.08  | 5.84            |
|         | Mixed         | 61.14  | 2.37         | 0.39     | 1.65     | 0.96     | 1.75     | -0.08    | 0.57    | -0.09    | 0.07  | 7.13            |
|         | Row-Row       | 61.05  | 2.31         | 0.38     | 1.61     | 0.92     | 1.73     | -0.09    | 0.51    | -0.10    | 0.07  | 6.95            |
|         | Combination   |        |              |          |          |          |          |          |         |          |       |                 |
|         | Butterfly     | 68.87  | 1.26         | 0.36     | 1.31     | 0.53     | 0.95     | -0.08    | 0.41    | -0.09    | 0.07  | 6.63            |
|         | Illusion      | 59.37  | 1.72         | 0.40     | 1.70     | 1.00     | 1.90     | -0.09    | 0.54    | -0.10    | 0.10  | 6.37            |
|         | Lorien        | 60.47  | 1.66         | 0.36     | 1.62     | 0.98     | 1.84     | -0.08    | 0.54    | -0.07    | 0.10  | 4.87            |
|         | Vanessa       | 58.83  | 3.66         | 0.39     | 1.80     | 1.17     | 2.04     | -0.07    | 0.63    | -0.06    | 0.06  | 5.50            |
|         | Bu+Lo-Mi      | 63.83  | 2.08         | 0.37     | 1.44     | 0.74     | 1.33     | -0.08    | 0.41    | -0.09    | 0.06  | 7.40            |
|         | Bu+Va-Mi      | 62.17  | 2.78         | 0.40     | 1.73     | 1.04     | 1.79     | -0.07    | 0.60    | -0.08    | 0.06  | 7.03            |
|         | Bu+Lo-Ro      | 59.37  | 2.12         | 0.38     | 1.67     | 1.02     | 1.93     | -0.09    | 0.57    | -0.10    | 0.08  | 6.03            |
|         | Bu+Va-Ro      | 59.20  | 2.49         | 0.39     | 1.77     | 1.06     | 1.96     | -0.08    | 0.69    | -0.10    | 0.07  | 8.07            |
|         | Illu+Lo-Mi    | 62.50  | 1.77         | 0.37     | 1.46     | 0.79     | 1.44     | -0.08    | 0.38    | -0.09    | 0.07  | 5.77            |
|         | Illu+Va-Mi    | 62.00  | 3.52         | 0.38     | 1.61     | 0.96     | 1.74     | -0.07    | 0.48    | -0.08    | 0.06  | 6.83            |
|         | Illu+Lo-Ro    | 59.67  | 2.23         | 0.39     | 1.64     | 0.92     | 1.76     | -0.10    | 0.51    | -0.11    | 0.07  | 6.63            |
|         | Illu+Va-Ro    | 60.03  | 1.74         | 0.40     | 1.75     | 1.03     | 1.97     | -0.09    | 0.65    | -0.11    | 0.09  | 8.57            |
| 2021/22 | Sowing method |        |              |          |          |          |          |          |         |          |       |                 |
|         | Control       | 61.72  | 2.48         | 0.36     | 1.48     | 0.81     | 1.38     | -0.08    | 0.44    | -0.08    | 0.08  | 4.61            |
|         | Mixed         | 61.10  | 2.43         | 0.34     | 1.44     | 0.74     | 1.36     | -0.07    | 0.41    | -0.07    | 0.07  | 4.92            |
|         | Row-Row       | 61.38  | 2.36         | 0.38     | 1.53     | 0.88     | 1.61     | -0.07    | 0.43    | -0.08    | 0.07  | 5.36            |
|         | Combination   |        |              |          |          |          |          |          |         |          |       |                 |
|         | Butterfly     | 66.47  | 3.07         | 1.09     | 0.34     | 1.26     | 0.53     | 0.89     | -0.08   | 0.36     | -0.08 | 0.06            |
|         | Illusion      | 61.40  | 1.72         | 1.10     | 0.36     | 1.37     | 0.57     | 0.92     | -0.09   | 0.34     | -0.09 | 0.10            |
|         | Lorien        | 59.07  | 2.10         | 1.09     | 0.34     | 1.55     | 0.94     | 1.55     | -0.07   | 0.53     | -0.09 | 0.09            |
|         | Vanessa       | 59.93  | 3.02         | 1.10     | 0.39     | 1.74     | 1.22     | 2.16     | -0.07   | 0.54     | -0.08 | 0.07            |
|         | Bu+Lo-Mi      | 61.73  | 2.49         | 1.08     | 0.32     | 1.38     | 0.69     | 1.27     | -0.07   | 0.39     | -0.08 | 0.07            |
|         | Bu+Va-Mi      | 62.50  | 3.04         | 1.10     | 0.36     | 1.45     | 0.76     | 1.36     | -0.07   | 0.43     | -0.06 | 0.05            |
|         | Bu+Lo-Ro      | 60.17  | 1.98         | 1.06     | 0.32     | 1.43     | 0.74     | 1.40     | -0.08   | 0.39     | -0.07 | 0.08            |
|         | Bu+Va-Ro      | 60.00  | 2.22         | 1.08     | 0.37     | 1.51     | 0.76     | 1.42     | -0.07   | 0.44     | -0.09 | 0.08            |
|         | Illu+Lo-Mi    | 61.90  | 1.90         | 1.11     | 0.36     | 1.45     | 0.84     | 1.52     | -0.07   | 0.42     | -0.08 | 0.07            |
|         | Illu+Va-Mi    | 62.50  | 3.23         | 1.11     | 0.38     | 1.51     | 0.86     | 1.55     | -0.07   | 0.42     | -0.09 | 0.06            |
|         | Illu+Lo-Ro    | 60.43  | 1.94         | 1.10     | 0.36     | 1.51     | 0.88     | 1.64     | -0.09   | 0.39     | -0.07 | 0.08            |
|         | Illu+Va-Ro    | 60.70  | 2.35         | 1.11     | 0.42     | 1.64     | 0.92     | 1.73     | -0.07   | 0.51     | -0.09 | 0.08            |

WA, water absorption; TimeC1, time development of C1; TC2, torque C2; TC3, torque C3; TC4, torque C4; TC5, torque C5; Amp., amplitude.
